# Supplementary material for: Knowledge User Perspectives on Integrated Knowledge Translation (iKT) in Health Interventions Research for People with Multiple Sclerosis: A Qualitative Descriptive Study
Source: Research Square preprint supplement (doi:10.21203/rs.3.rs-6734715/v1), 2025-06-03
Supplement: Supplementary file [file 5bba2743e05f486d03e6feeb.pdf]

### GRIPP2 Long Form (GRIPP2-LF) Reporting Checklist

| Section and topic                                      | Item                                                                                                  | Reported on page No |
|--------------------------------------------------------|-------------------------------------------------------------------------------------------------------|---------------------|
| <b>Section 1: Abstract of paper</b>                    |                                                                                                       |                     |
| 1a: Aim                                                | Report the aim of the study                                                                           | 1                   |
| 1b: Methods                                            | Describe the methods used by which patients and the public were involved                              | 1                   |
| 1c: Results                                            | Report the impacts and outcomes of PPI in the study                                                   | 1                   |
| 1d: Conclusions                                        | Summarise the main conclusions of the study                                                           | 1                   |
| 1e: Keywords                                           | Include PPI, “patient and public involvement,” or alternative terms as keywords                       | 2                   |
| <b>Section 2: Background to paper</b>                  |                                                                                                       |                     |
| 2a: Definition                                         | Report the definition of PPI used in the study and how it links to comparable studies                 | 3                   |
| 2b: Theoretical underpinnings                          | Report the theoretical rationale and any theoretical influences relating to PPI in the study          | 3                   |
| 2c: Concepts and theory development                    | Report any conceptual or theoretical models, or influences, used in the study                         | 3                   |
| <b>Section 3: Aims of paper</b>                        |                                                                                                       |                     |
| 3: Aim                                                 | Report the aim of the study                                                                           | 3                   |
| <b>Section 4: Methods of paper</b>                     |                                                                                                       |                     |
| 4a: Design                                             | Provide a clear description of methods by which patients and the public were involved                 | 3-4                 |
| 4b: People involved                                    | Provide a description of patients, carers, and the public involved with the PPI activity in the study | 4                   |
| 4c: Stages of involvement                              | Report on how PPI is used at different stages of the study                                            | 5                   |
| 4d: Level or nature of involvement                     | Report the level or nature of PPI used at various stages of the study                                 | 5                   |
| <b>Section 5: Capture or measurement of PPI impact</b> |                                                                                                       |                     |
| 5a: Qualitative evidence of impact                     | If applicable, report the methods used to qualitatively explore the impact of PPI in the study        | 4                   |

|                                              |                                                                                                                                                                                               |       |
|----------------------------------------------|-----------------------------------------------------------------------------------------------------------------------------------------------------------------------------------------------|-------|
| 5b: Quantitative evidence of impact          | If applicable, report the methods used to quantitatively measure or assess the impact of PPI                                                                                                  | N/A   |
| 5c: Robustness of measure                    | If applicable, report the rigour of the method used to capture or measure the impact of PPI                                                                                                   | N/A   |
| <b>Section 6: Economic assessment</b>        |                                                                                                                                                                                               |       |
| 6: Economic assessment                       | If applicable, report the method used for an economic assessment of PPI                                                                                                                       | N/A   |
| <b>Section 7: Study results</b>              |                                                                                                                                                                                               |       |
| 7a: Outcomes of PPI                          | Report the results of PPI in the study, including both positive and negative outcomes                                                                                                         | 7-10  |
| 7b: Impacts of PPI                           | Report the positive and negative impacts that PPI has had on the research, the individuals involved (including patients and researchers), and wider impacts                                   | 7-13  |
| 7c: Context of PPI                           | Report the influence of any contextual factors that enabled or hindered the process or impact of PPI                                                                                          | 12-13 |
| 7d: Process of PPI                           | Report the influence of any process factors, that enabled or hindered the impact of PPI                                                                                                       | 10-13 |
| 7ei: Theory development                      | Report any conceptual or theoretical development in PPI that have emerged                                                                                                                     | N/A   |
| 7eii: Theory development                     | Report evaluation of theoretical models, if any                                                                                                                                               | N/A   |
| 7f: Measurement                              | If applicable, report all aspects of instrument development and testing (eg, validity, reliability, feasibility, acceptability, responsiveness, interpretability, appropriateness, precision) | N/A   |
| 7g: Economic assessment                      | Report any information on the costs or benefit of PPI                                                                                                                                         | N/A   |
| <b>Section 8: Discussion and conclusions</b> |                                                                                                                                                                                               |       |
| 8a: Outcomes                                 | Comment on how PPI influenced the study overall. Describe positive and negative effects                                                                                                       | 13-16 |
| 8b: Impacts                                  | Comment on the different impacts of PPI identified in this study and how they contribute to new knowledge                                                                                     | 13-17 |

|                                           |                                                                                                                                           |       |
|-------------------------------------------|-------------------------------------------------------------------------------------------------------------------------------------------|-------|
| 8c: Definition                            | Comment on the definition of PPI used (reported in the Background section) and whether or not you would suggest any changes               | 14    |
| 8d: Theoretical underpinnings             | Comment on any way your study adds to the theoretical development of PPI                                                                  | 13-17 |
| 8e: Context                               | Comment on how context factors influenced PPI in the study                                                                                | 16    |
| 8f: Process                               | Comment on how process factors influenced PPI in the study                                                                                | 16    |
| 8g: Measurement and capture of PPI impact | If applicable, comment on how well PPI impact was evaluated or measured in the study                                                      | N/A   |
| 8h: Economic assessment                   | If applicable, discuss any aspects of the economic cost or benefit of PPI, particularly any suggestions for future economic modelling.    | N/A   |
| 8i: Reflections/critical perspective      | Comment critically on the study, reflecting on the things that went well and those that did not, so that others can learn from this study | 13-16 |
